# Supplementary material
Source: PubMed Central journal article supplement (PMC535691)
Supplement: nar_32_21_6437__1.pdf [file nar_32_21_6437__1.pdf]

## Supplementary material

SVMProt predicted functional classes of selected proteins of unknown function. These proteins are either without a homolog or without functional indication in Swissprot or NR database as of September 2004.

| <b>Protein<br/>(SwissProt AC<br/>number)<br/>[ORGANISM]</b>           | <b>Database<br/>without<br/>Homolog or<br/>Reported<br/>Functional<br/>Indication</b> | <b>Functional<br/>Status</b>  | <b>Number<br/>of amino<br/>acids</b> | <b>Functional class predicted by SVMPROT</b>                                                                                                                                                                                                                         |
|-----------------------------------------------------------------------|---------------------------------------------------------------------------------------|-------------------------------|--------------------------------------|----------------------------------------------------------------------------------------------------------------------------------------------------------------------------------------------------------------------------------------------------------------------|
| Hypothetical protein (Q74FX6)<br>[Geobacter sulfurreducens]           | SwissProt                                                                             | without functional indication | 386                                  | EC 3.6. Hydrolases Acting on Acid Anhydrides (94.7%);<br>EC 5.4. Intramolecular Transferases (65.4%);<br>EC 2.7. Transferases - Transferring Phosphorus-Containing Groups (65.4%);                                                                                   |
| Hypothetical protein LT.09 (Q95Z87)<br>[Leishmania major]             | NR                                                                                    | no homolog                    | 1864                                 | EC 3.6. Hydrolases Acting on Acid Anhydrides (92.9%);<br>EC 2.7. Transferases - Transferring Phosphorus-Containing Groups (73.8%);<br>EC 4.3. Carbon-Nitrogen Lyases (73.8%);<br>EC 1.16. Oxidoreductases - Oxidising metal ions (58.6%);<br>Outer membrane (58.6%); |
| Hypothetical protein (Q83YN8)<br>[Pseudomonas syringae pv. delphinii] | SwissProt                                                                             | without functional indication | 281                                  | EC 1.1. Oxidoreductases Acting on the CH-OH group of donors (94.7%);<br>EC 2.4. Glycosyltransferases (92.9%);<br>Outer membrane (58.6%);                                                                                                                             |
| Hypothetical protein (Q7XH80)<br>[Oryza sativa]                       | SwissProt                                                                             | without functional indication | 346                                  | EC 1.1: Oxidoreductases Acting on the CH-OH group of donors (92.9%);<br>Transmembrane (91.3%);<br>EC 3.1. Hydrolases - Acting on Ester Bonds (82.2%);<br>EC 4.99: Lyases - Other Lyases (58.6%);                                                                     |
| Hypothetical protein B1104G07.4-2 (Q6Z5Z5)<br>[Oryza sativa]          | SwissProt                                                                             | without functional indication | 556                                  | EC 2.7: Transferases - Transferring Phosphorus-Containing Groups (99.1%);                                                                                                                                                                                            |

|                                                                |           |                               |     |                                                                                                                                                                                                                                                      |
|----------------------------------------------------------------|-----------|-------------------------------|-----|------------------------------------------------------------------------------------------------------------------------------------------------------------------------------------------------------------------------------------------------------|
| Hypothetical protein OSJNBa0010I09.2 7 (Q8S7H1) [Oryza sativa] | SwissProt | without functional indication | 329 | EC 2.7. Transferases - Transferring Phosphorus-Containing Groups (99.0%);<br>EC 3.1. Hydrolases - Acting on Ester Bonds (97.3%);<br>EC 5.4. Intramolecular Transferases (82.2%);<br>EC 2.4. Glycosyltransferases (65.4%);<br>Outer membrane (58.6%); |
| Hypothetical protein (Q7RWP4) [Neurospora crassa]              | SwissProt | without functional indication | 856 | EC 2.7. Transferases - Transferring Phosphorus-Containing Groups (99.0%);<br>DNA-binding Proteins (85.4%);                                                                                                                                           |
| Hypothetical protein K07E3.2 (Q21287) [Caenorhabditis elegans] | NR        | no homolog                    | 837 | EC 2.7. Transferases - Transferring Phosphorus-Containing Groups (99.0%);<br>DNA-binding Proteins (73.8%);                                                                                                                                           |
| Hypothetical protein F28O9.50 (Q9M2M7) [Arabidopsis thaliana]  | SwissProt | without functional indication | 439 | EC 2.7. Transferases - Transferring Phosphorus-Containing Groups (98.9%);<br>DNA-binding Proteins (97.5%);<br>EC 3.1. Hydrolases - Acting on Ester Bonds (89.3%);<br>EC 2.4. Glycosyltransferases (62.2%);                                           |
